# Supplementary material for: A computationally light-weight model for ensemble forecasting of environmental hazard: General TAMSAT-ALERT v1.2.1
Source: Copernicus journal article supplement (doi:10.5194/gmd-2024-75), 2024-05-06
Supplement: Supplementary file [file gmd-2024-75-AC1-supplement.pdf]

This paper documents a general method of producing forecasts by taking observations up to a point and combining with the historical distribution as a plausible ensemble of outcomes from that point. It is clearly a valuable tool (having already been used in several real-world contexts) and is worthy of publication, with the documentation allowing other researchers / users to deploy the method for themselves.

I have no hesitation recommending this for publication, barring a few minor comments listed below - mostly to improve clarity, although there is one suggestion that the years for the case studies should be changed such that the forecast method is "fair" and doesn't assume knowledge of future conditions from each forecast.

Thank you for your constructive comments. I have re-done the forecasts in the examples using only data from the past. I hope that an additional appendix, summarising the TAMSAT-ALERT method will help make the paper clearer,

Minor comments

L30 "hazard(s)"

ok

L39 "drift in predictions" is this really a fundamental problem? Surely it is simply fixed with bias correction. OK bias correction is often not simple, but as written suggests that the problem is insurmountable. Perhaps a brief note here for completeness would be useful.

I have changed 'fundamental' to 'challenging' and have included an extra sentence explaining that this type of bias is difficult to correct for because it depends on the lead time.

L46 "seamless integration of past and future conditions facilitates in-season updates for slowly developing hazards". Is this really unique to the method? NWP/seasonal forecast systems do exactly this - accounting for past conditions (represented by the initial state, eg. initialised soil moisture capturing antecedent rainfall) and evolving into the future. This is easy to be updated in-season - just run with a more recent initial state. Of course this doesn't stop it being a 'feature' of the GT-A method, but it would be clearer to really focus on its uniqueness (parsimonious and quick method of making a forecast for any variable by integrating current state with plausible future states, allowing testing of some simple assumptions around climate indices and non-stationarity)

I didn't intend to claim that this is a unique feature of TAMSAT-ALERT. However, it is surprisingly fiddly to combine past time series with future predictions that (a) do not have any 'jumps' on the initialisation date, (b) are not affected by model drift and (c) have consistent daily/monthly statistics throughout the time series. I have added in an extra sentence clarifying this.

L77 "continually" typo

Missing word now added (sorry for the oversight)

L82 "tThe" typo

Corrected

Figure 1 Nice figure. Would suggest simplifying the text in boxes as much as possible and making them active/imperative sentences rather than passive (i.e. put the verb at the front) e.g. "Define initialisation date and period of interest" (don't need to specify "user" since the box color tells us

that); "Calculate gridded difference time series". Also, is it possible to add the numbered steps from the previous stage on to this figure? Not quite sure it is, but it may be unnecessarily confusing to have two parallel descriptions of the method which don't map on to each other.

Excellent suggestions. I have re-made the figure (see also response to R2)

L134 "incrementing forecasts". Not sure this is explained fully. I think you mean, that the historical data is transformed into anomalies relative to the initial state for that year, and then added on to the current state? e.g. if June 1981 is 23C and July 1981 is 24C, and June 2024 is 20C, then that 'member' produces a forecast of 21C for July 2024. Unpacking the method here or elsewhere would help clarify.

I have added a few lines on this to section 3.1.2 Case study 1: Data and methodology

L203 Setup 1 - essentially means that July FC is just the ensemble of values for historical Julys. This becomes obvious later but could be spelt out here.

This is clarified

L204 How are they weighted? I note the appendix giving details of the exponential weighting, but this includes a coefficient. Which is used here?

The weighting coefficient is arbitrarily set to 1

L206 "Day of initialisation" is confusing since you're using monthly data in this example. Also missing a note to say you're making forecasts at a 1-month lead (June)

Clarified

Figure 2 missing subheadings ( (a) etc, but could also include the name of the set-up rather than needing to refer to caption). Can also get rid of legend in 3/4 plots and use the space to make the plots bigger. Also, y axis units missing.

I think the referee meant Figure 3. The suggested corrections have been made, and I have used 2018 because it is a more striking example than the original choice.

Figure 4 Caption missing D

ok

Figure 5 units missing on top plot. Also please mention what the subnational borders represent (e.g. states ... although you could easily show this plot with just country borders -since the distinction of the admin1 regions is not relevant or discussed, and is not included on subsequent plots)

I have removed the sub-national borders and just included the country border for Pakistan. I have also made some other changes to the figure in response to R2.

Sec 3.1.1 Missing info on if forecasts were produced with weighting, incremental option or both. Also now this case study uses gridded data, maybe worth pointing out that the method runs independently on gridpoints.

The forecasts were run with incrementation but no weighting. This is now clarified

Figure 6a Is it possible to achieve negative NDVI? If so please comment on what this represents.

It is possible to have negative NDVI. It usually signifies low/no vegetation cover and/or poor quality data. However, there were very few negative values in these plots and so I have adjusted the colour bar accordingly.

L273 The scores here are calculated now across all gridpoints for the single forecast?

Yes – that's right. Now clarified in the text.

L282 Did you test all the set-ups with Case study 2? If so do you find that the weighted years + persistence brings minimal improvement beyond just using persistence?

I did do this, and there was a minimal (probably statistically insignificant) improvement, because there is no strong teleconnection or trend in the data. For the sake of brevity and maintaining focus I decided not to include these results in the paper. I see the purpose of the case studies is to illustrate the functionality of the General TAMSAT-ALERT method, rather than to provide any sort of comprehensive skill assessments.

Figure 7 please add an extra colour so the color changes match up with the labelled intervals

ok

L306 "(a)ccumulations"

corrected

L314 Deriving probabilities from ensemble mean and spread requires Gaussian assumption. Why not just count percentage of members below a threshold since it doesn't assume anything? Does it make a difference? If this is avoided deliberately please document the reason.

SPI really should be Gaussian (although the transformation is never perfect), and the use of empirical methods can be noisy especially for shorter time series and extremes. I have added this clarification into the text.

L325 "negative anomalies are also (incorrectly) forecast in southern Africa" - although, negative anomalies are correct for South Africa

Clarified

L425 I feel like it would help to discuss a little this weighting method in the main text. A few different weighting strengths are shown - are these discrete options for the user or can they set this to any value? It would probably also be helpful to give some guidance on which weighting to choose (maybe the point is that it's up to the users to play around and decide what makes most sense to them - in which case that is also useful thing to say).

Additional text on the weighting has been added to the methodology section.

Figure A1: just looking at this it becomes clear that the forecasts in the case studies are made with knowledge of future conditions. This is not a fair forecasting test - really it should be an out-of-sample event, not including any 'future' information. I realise the paper is not primarily 'about' forecasting, but I would prefer to see the analysis reproduced taking this into account. For Case study 1 it could just be switched to July 2023 with presumably the same result. Also Case study 3 could also be switched to 2023 - which was also a very wet El Nino year in the region so should look similar. Case study 2 maybe more difficult, but is there a more recent drought that could be used (and, basing the forecast production on a period truncated to the year before that event?

For the years hindcast, the data for that particular year are removed from the climatological ensemble, so there should not be any substantial difference in skill. Regarding the case studies:

- For the CET case study, because 2021 was the last date within the file we were using, the example shown is outside the range of the climatological ensemble
- I have re-done the NDVI example for 2018, truncating the data at that point
- For the SPI, I truncated the data to 2015 and showing that El Nino
